# Supplementary material for: Mathematical Modelling of Cell-Fate Decision in Response to Death Receptor Engagement
Source: PLOS journal article supplement (doi:10.1371/journal.pcbi.1000702), 2010-03-04
Supplement: S1 (10.1371/journal.pcbi.1000702.s001) [file journal.pcbi.1000702.s001]

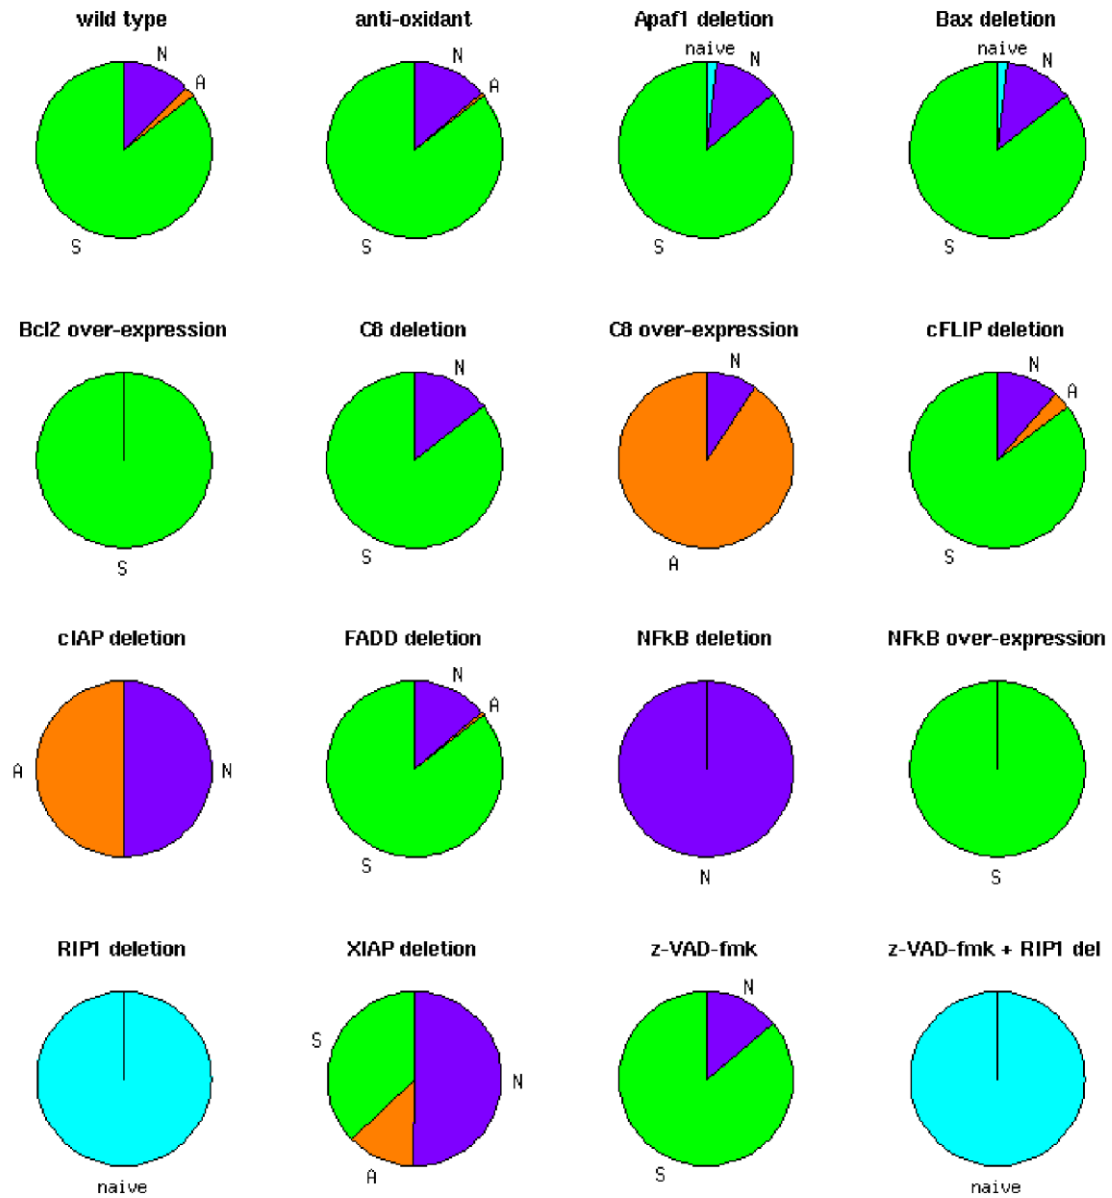

Supp. Figure S1. Simulations of the reduced cell fate model incremented by the interaction  $cIAP \dashv CASP8$  with  $TNF=1$ ,  $FasL=0$ .
