# Supplementary material for: Mathematical Modelling of Cell-Fate Decision in Response to Death Receptor Engagement
Source: PLOS journal article supplement (doi:10.1371/journal.pcbi.1000702), 2010-03-04
Supplement: S2 (10.1371/journal.pcbi.1000702.s002) [file journal.pcbi.1000702.s002]

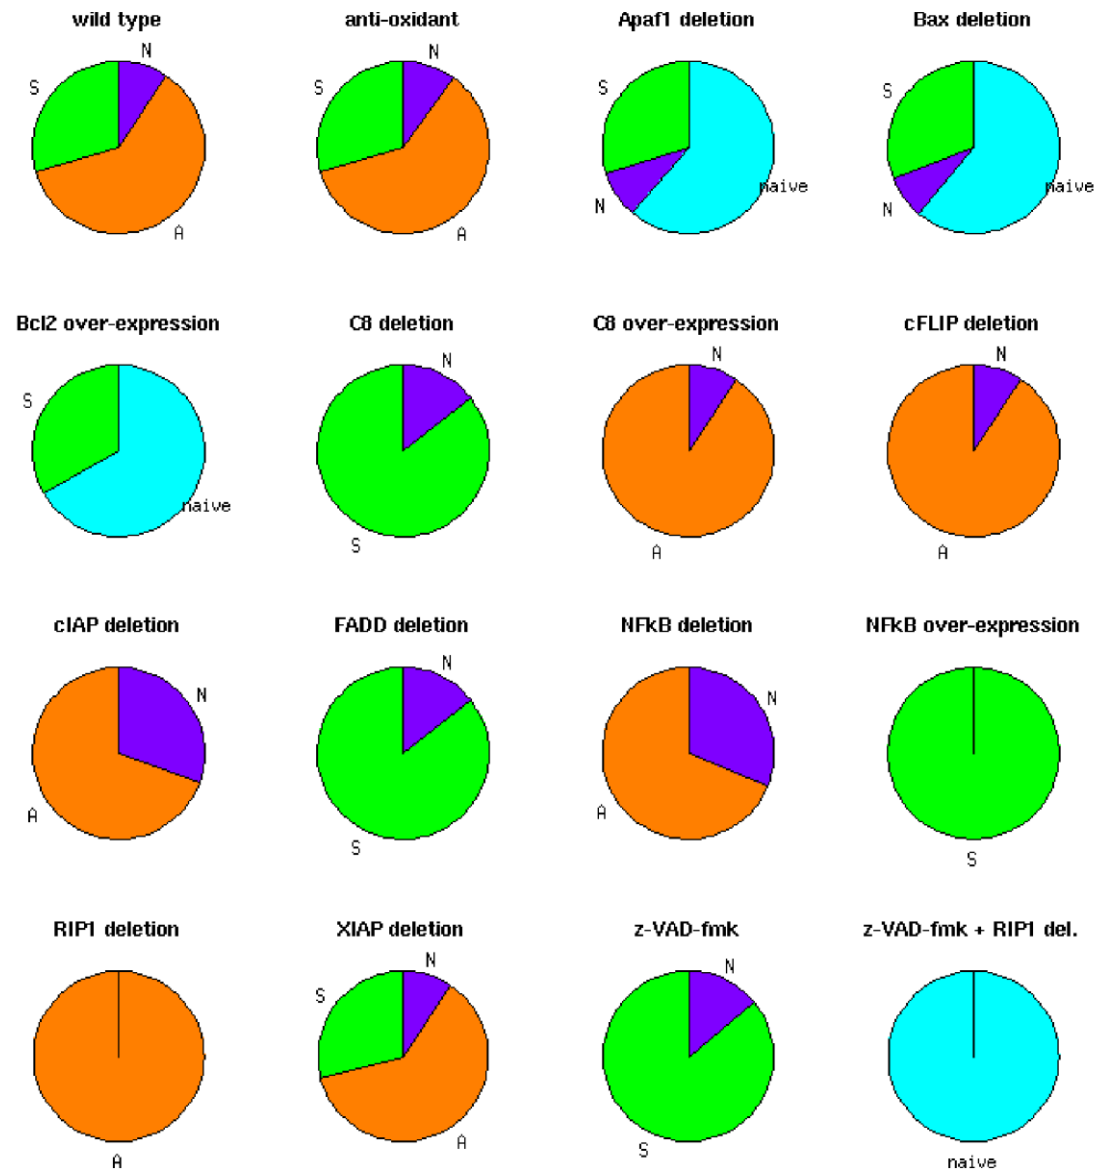

Supp. Figure S2. Simulations of the model after deletion of the interaction  $\text{CASP3} \Rightarrow \text{CASP8}$  from the model with  $\text{TNF}=1$ ,  $\text{FasL}=0$ .
