# Supplementary material for: Mathematical Modelling of Cell-Fate Decision in Response to Death Receptor Engagement
Source: PLOS journal article supplement (doi:10.1371/journal.pcbi.1000702), 2010-03-04
Supplement: S7 (10.1371/journal.pcbi.1000702.s007) [file journal.pcbi.1000702.s007]

| <b>Removed variables</b> | <b>Justification</b>                                                                                                                                                                                                                                                                  |
|--------------------------|---------------------------------------------------------------------------------------------------------------------------------------------------------------------------------------------------------------------------------------------------------------------------------------|
| FADD                     | In wild type, the input FADD is only relevant when it is equal to 1. The case where FADD=0 will be considered later as a “mutant case”.                                                                                                                                               |
| TNFR, DISC-TNF           | DISC-TNF (Complex II) is directly activated by TNFR, which is itself directly activated by TNF. The influence of these two variables is replaced by a direct activation by TNF (losing the necessity of forming Complex II to activate the apoptosis pathway via TNF-induced signal). |
| DISC-FAS                 | For similar reasons, DISC-FAS is removed and replaced by a direct activation by FasL.                                                                                                                                                                                                 |
| RIP1K, RIP1ub, IKK       | RIP1K, RIP1ub, and IKK influences are replaced by RIP1 itself.                                                                                                                                                                                                                        |
| cFLIP                    | cFLIP is replaced by a direct inhibition of NFkB on caspase-8.                                                                                                                                                                                                                        |
| BCL2, BAX                | The actions of BCL2 and BAX are included in the rules of MOMP (with inputs from NFkB) and of MPT for BCL2                                                                                                                                                                             |
| XIAP, Cyt_c, apoptosome  | The actions of these variables are included in the rule of caspase-3.                                                                                                                                                                                                                 |
| SMAC                     | SMAC rule is included in the rule of cIAP.                                                                                                                                                                                                                                            |

Supp. Table S3. List of variables hidden from the master model to generate the reduced model.
