# Supplementary material for: Mathematical Modelling of Cell-Fate Decision in Response to Death Receptor Engagement
Source: PLoS Comput Biol. 2010 Mar 5;6(3):e1000702. doi: 10.1371/journal.pcbi.1000702 (PMC2832675; doi:10.1371/journal.pcbi.1000702)
Supplement: Table S2 — List of mutants simulated with the conceptual 3-node model. (0.03 MB PDF) [file pcbi.1000702.s006.pdf]

| Mutants       | changes in the structure - deleted paths                                   | phenotypes                                                         | comments                                                                                             |
|---------------|----------------------------------------------------------------------------|--------------------------------------------------------------------|------------------------------------------------------------------------------------------------------|
| anti-oxidants | no changes                                                                 | 000 (naive)<br>001 (necrosis)<br>010 (survival)<br>100 (apoptosis) | similar to WT                                                                                        |
| APAF1 del     | CASP3 => CASP3                                                             | 000 (naive)<br>001 (necrosis)<br>010 (survival)                    | loss of apoptosis, equivalent to a deletion of CASP3                                                 |
| Bax del       | CASP3 => CASP3 (paths 4, 5)                                                | 000 (naive)<br>001 (necrosis)<br>010 (survival)                    | loss of apoptosis                                                                                    |
| Bcl2 op       | MPT =0 & CASP3 => CASP3 (paths 4, 5)                                       | 000 (naive)<br>010 (survival)                                      | loss of apoptosis and necrosis                                                                       |
| Casp8 del     | CASP3 => CASP3 (paths 4, 5) & CASP3 -  MPT (path 17)                       | 000 (naive)<br>001 (necrosis)<br>010 (survival)                    | loss of apoptosis                                                                                    |
| Casp8 op      | NFkB => NFkB (paths 2, 3) & CASP3 -  MPT (path 17) & MPT -  NFkB (path 13) | 000 (naive)<br>001 (necrosis)<br>100 (apoptosis)                   | loss of survival, similar to cFLIP del and RIP1 del                                                  |
| cFLIP del     | NFkB => NFkB (paths 2, 3) & CASP3 -  MPT (path 17) & MPT -  NFkB (path 13) | 000 (naive)<br>001 (necrosis)<br>100 (apoptosis)                   | loss of survival, similar to Casp8 op and RIP1 del                                                   |
| cIAP del      | NFkB => NFkB (paths 2, 3) & MPT -  NFkB (path 13)                          | 000 (naive)<br>001 (necrosis)<br>100 (apoptosis)                   | loss of survival                                                                                     |
| FADD del      | CASP3 => CASP3 (paths 4, 5) & CASP3 -  MPT (path 17)                       | 000 (naive)<br>001 (necrosis)<br>010 (survival)                    | loss of apoptosis                                                                                    |
| NFkB del      | NFkB=0 (paths 2, 3)                                                        | 000 (naive)<br>001 (necrosis)<br>100 (apoptosis)                   | loss of survival                                                                                     |
| NFkB op       | CASP3 => CASP3 MPT => MPT                                                  | 000 (naive)<br>010 (survival)                                      | loss of cell death                                                                                   |
| RIP1 del      | NFkB => NFkB (paths 2, 3) & CASP3 -  MPT (path 17) & MPT -  NFkB (path 13) | 000 (naive)<br>001 (necrosis)<br>100 (apoptosis)                   | loss of survival, similar to Casp8 op and cFLIP del (In the full model, necrosis disappears as well) |
| XIAP del      | no changes                                                                 | 000 (naive)<br>001 (necrosis)<br>010 (survival)<br>100 (apoptosis) | similar to WT                                                                                        |
| z-VAD-fmk     | CASP3 => CASP3                                                             | 000 (naive)<br>001 (necrosis)<br>010 (survival)                    | loss of apoptosis                                                                                    |

Supp. Table S2. List of mutants simulated with the conceptual 3-node model.
